# Supplementary material
Source: PubMed Central journal article supplement (PMC3474923)
Supplement: emboj2012247s1.pdf [file emboj2012247s1.pdf]

A

```

hSSB1 (Richard et al., 2008) .....MTTETFVKDIKPLKLNLI FIVLETGRVTKTKDGHEVRTCKVADKTGSINISVWDDVGNLIQPGDI IRLTKG
human OBFC2B (ensemble) .....MTTETFVKDIKPLKLNLI FIVLETGRVTKTKDGHEVRTCKVADKTGSINISVWDDVGNLIQPGDI IRLTKG
mouse Obfc2b (212aa) .....MTTETFVKDIKPLKLNLI FIVLETGRVTKTKDGHEVRTCKVADKTGSINISVWDDVGNLIQPGDI IRLTKG
mouse Obfc2b (228aa) MRVQEDLPTGCHGSGSMTTETFVKDIKPLKLNLI FIVLETGRVTKTKDGHEVRTCKVADKTGSINISVWDDVGNLIQPGDI IRLTKG

hSSB1 (Richard et al., 2008)
human OBFC2B (ensemble) YASVFKGCLTLYTGRGGDLQKIGEFMVMYSEVPNFSEPNPEYSTQQAPNKAVQN-DSNPSASQPTTGPSAASPASENQNGNLSAPPGP
mouse Obfc2b (212aa) YASVFKGCLTLYTGRGGDLQKIGEFMVMYSEVPNFSEPNPEYSTQQAPNKAVQN-DSNPSASQPTTGPSAASPASENQNGNLSAPPGP
mouse Obfc2b (228aa) YASVFKGCLTLYTGRGGDLQKIGEFMVMYSEVPNFSEPNPEYNTQQAPNKSVQNDNSPTAPQATTGPPAASPASENQNGNLSAQQLGP
YASVFKGCLTLYTGRGGDLQKIGEFMVMYSEVPNFSEPNPEYNTQQAPNKSVQNDNSPTAPQATTGPPAASPASENQNGNLSAQQLGP

hSSB1 (Richard et al., 2008)
human OBFC2B (ensemble) GGGPHPPHTPSHPPSTRITRSQPNHTFAGPPGSSNPVSNKGKTRRSSKR Chromosome 12; 13q
mouse Obfc2b (212aa) GGGPHPPHTPSHPPSTRITRSQPNHTFAGPPGSSNPVSNKGKTRRSSKR Chromosome 12; 13q
mouse Obfc2b (228aa) VGGPHPSHTPSHPPSTRITRSQPNHTFSGPPGSSNPVSNKGKTRRSSKR Chromosome 10; D3
VGGPHPSHTPSHPPSTRITRSQPNHTFSGPPGSSNPVSNKGKTRRSSKR Chromosome 10; D3

mouse Obfc2b (212aa) .....MTTETFVKDIKPLKLNLI FIVLETGRVTKTKDGHEVRTCKVADKTGSINISVWDDVGNLIQPGDI IRLTKG
mouse Obfc2b (228aa) MRVQEDLPTGCHGSGSMTTETFVKDIKPLKLNLI FIVLETGRVTKTKDGHEVRTCKVADKTGSINISVWDDVGNLIQPGDI IRLTKG
mouse Obfc2a ..... MHGVNDPPLFKDIKAGLKNLNVV FIVLEIGRVTKTKDGHEVRSCKVADR TGSITISVWDEIGGLIQGDI IRLTRG

mouse Obfc2b (212aa) YASVFKGCLTLYTGRGGDLQKIGEFMVMYSEVPNFSEPNPEYNTQQAPNKSVQNDNSPTAPQATTGPPAASPASENQNGNLSAQQLGP
mouse Obfc2b (228aa) YASVFKGCLTLYTGRGGDLQKIGEFMVMYSEVPNFSEPNPEYNTQQAPNKSVQNDNSPTAPQATTGPPAASPASENQNGNLSAQQLGP
mouse Obfc2a YASMWKGLTLYTGRGGE LQKIGEFMVMYSEVPNFSEPNPDYRQGG--NRGVQNEQKDKLS--TNTFGPVGNGDQTGPESRGYHLPYGR

mouse Obfc2b (212aa) VGGPHPSHTPSHPPSTRITRSQPNHTFSGPPGSSNPVSNKGKTRRSSKR Chromosome 10; D3
mouse Obfc2b (228aa) VGGPHPSHTPSHPPSTRITRSQPNHTFSGPPGSSNPVSNKGKTRRSSKR Chromosome 10; D3
mouse Obfc2a SNGGPI-SPLPG-----TPSSQTVRTT--ISNARDPRRAFKR Chromosome 1; C1.1
    
```

B

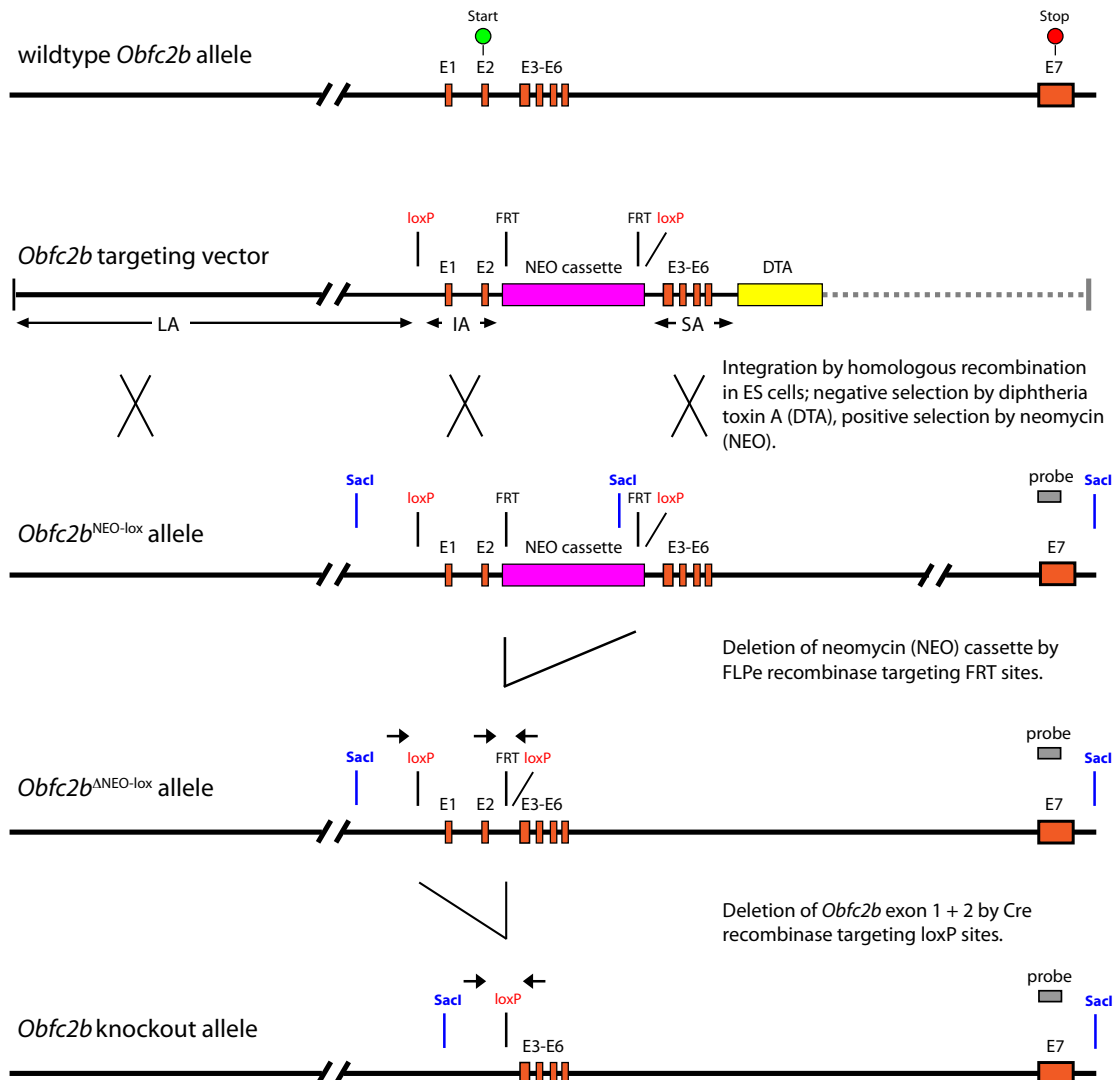

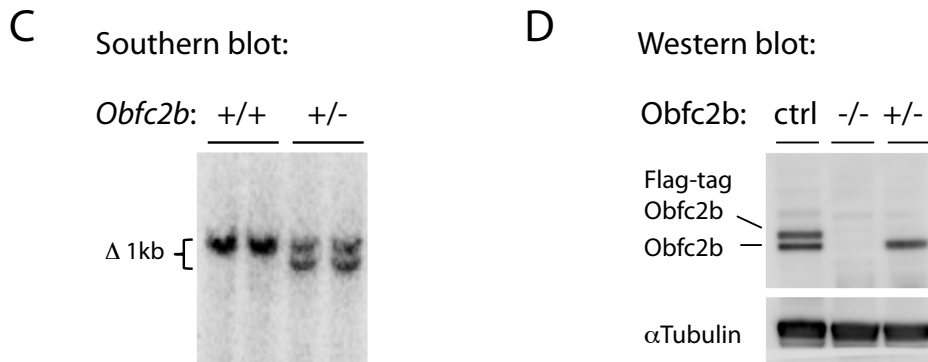

**Supplemental Figure 1: Gene targeting strategy to generate conditional knockout mice for the mouse *hSsb1* orthologue *Obfc2b*.**

(A) Alignment of the amino acid sequences of human hSSB1 (Richard et al., 2008), human OBFC2B (ensemble) and mouse *Obfc2b* (ensemble; upper panel). (Lower panel) Alignment of mouse *Obfc2b* (*hSsb1*) and *Obfc2a* (*hSsb2*) amino acid sequences (ensemble). (B) Gene targeting strategy showing the wildtype *Obfc2b* allele, the *Obfc2b* targeting vector, the targeted *Obfc2b*<sup>NEO-lox</sup> allele carrying the neomycin cassette, the targeted allele after excision of the neomycin cassette by FRT site specific recombination using FLPe mice (*Obfc2b*<sup>NEO-lox</sup>), and the targeted "knockout" allele after excision of Exon 1 and 2 of *Obfc2b* by loxP site specific recombination using *E11A*<sup>Cre</sup> mice. Diphtheria toxin A (DTA) was used for negative selection during ES cell targeting, neomycin was used for positive selection. Genomic sequences of the *Obfc2b* gene for the generation of the targeting vector were amplified using the following primers: 5'-CTCGAGCCCGGCAGGTAAGGTAAT-3' and 5'-ACCGGTGCTAGGTTAATTAATAATATTATGGAATGCAGCAGGAAAAC-3' (long arm, LA), 5'-TTAATTAATAACTTCGTATAATGTATGCATACGAAGTTATCGCCCTTGGACCTTTTTTCC-3' and 5'-ACCGGTGGCCGGCCTTTTATACCTGTCAGCAGCTCCC-3' (intermediate arm, IA), 5'-TTAATTAATAGGTAAAATAATGGCCTGATG-3' and 5'-GCGGCCGCATCCTGTTTGGCACACCTGG-3' (short arm, SA). For genotyping of *Obfc2b* wildtype, knockout and *Obfc2b*<sup>NEO-lox</sup> alleles by Southern blot, genomic DNA was digested by *SacI* and blotted as previously described (Robbiani et al., 2008). The probe for Southern blot was generated using 5'-CGAGAACCAGAACGGAAATGG-3' as forward and 5'-GGTGAAGGAAGGAGAGACTCATC-3' as reverse primer. Location of the probe used and the *SacI* recognition sites is indicated in A. For genotyping by PCR, wildtype, knockout and *Obfc2b*<sup>lox</sup> alleles were amplified using the following primers and conditions: 5'-GGGAGCTGCTGACAGGTATAAAA-3' and 5'-GATAGTGGTGATGGTGAGAGTCCG-3' for amplification of wildtype (214 nt) and floxed allele (322 nt), and 5'-GATAGTGGTGATGGTGAGAGTCCG-3' and 5'-GGCTTGCTTTTTATGTTCCG-3' for amplification of the knockout allele (639 nt, 35 cycles using 56.5 C annealing temperature and 45 s extension time). Location of primers used for genotyping PCRs is indicated by arrows. (C) Presence of the *Obfc2b* knockout allele was confirmed by Southern blot on tail genomic DNA. (D) Loss of *Obfc2b* protein was verified by Western blot on lysates from *CD19*<sup>Cre</sup>; *Obfc2b*<sup>lox/-</sup> B cells. Lysates of BOSC23 cells expressing Flag-tag *Obfc2b* protein were used as positive controls.



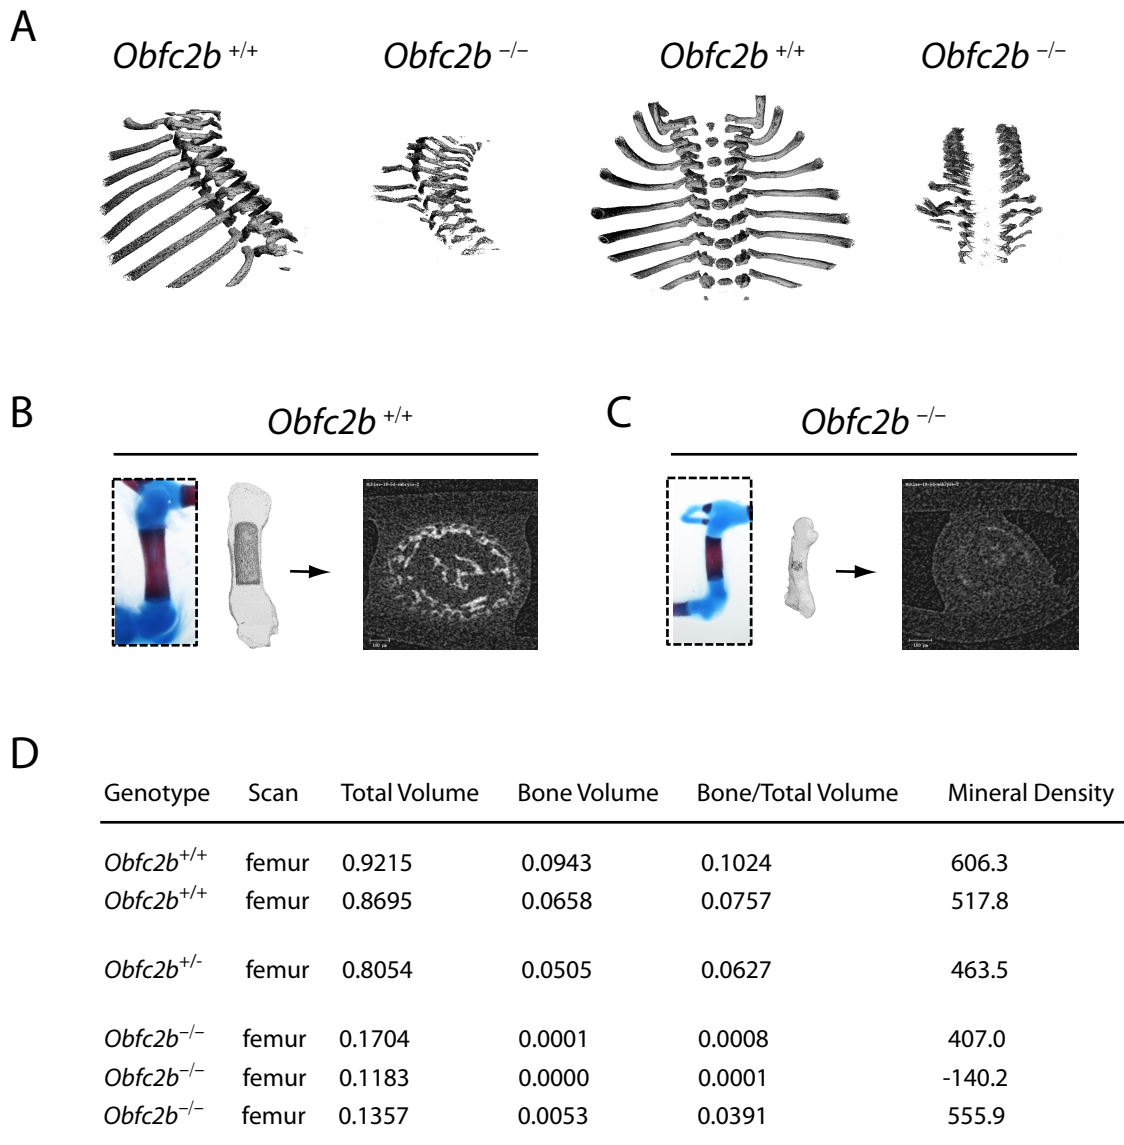

**Supplemental Figure 2: MicroCT analysis of skeletal defects in *Obfc2b*<sup>-/-</sup> embryos.**

(A) Rib cage regions from whole embryos (P0) were scanned by micro-computer tomography (MicroCT). (B/C) Femurs from skeletal preparations of E18.5 embryos (left) are screened by MicroCT and shown as three-dimensional (middle) and two-dimensional images (right). The latter are cross-sections of the mineralized fraction. (D) Values of MicroCT analysis of femurs from two *Obfc2b* wildtype (+/+), one heterozygous (+/-) and three knockout (-/-) embryos as shown in B/C.

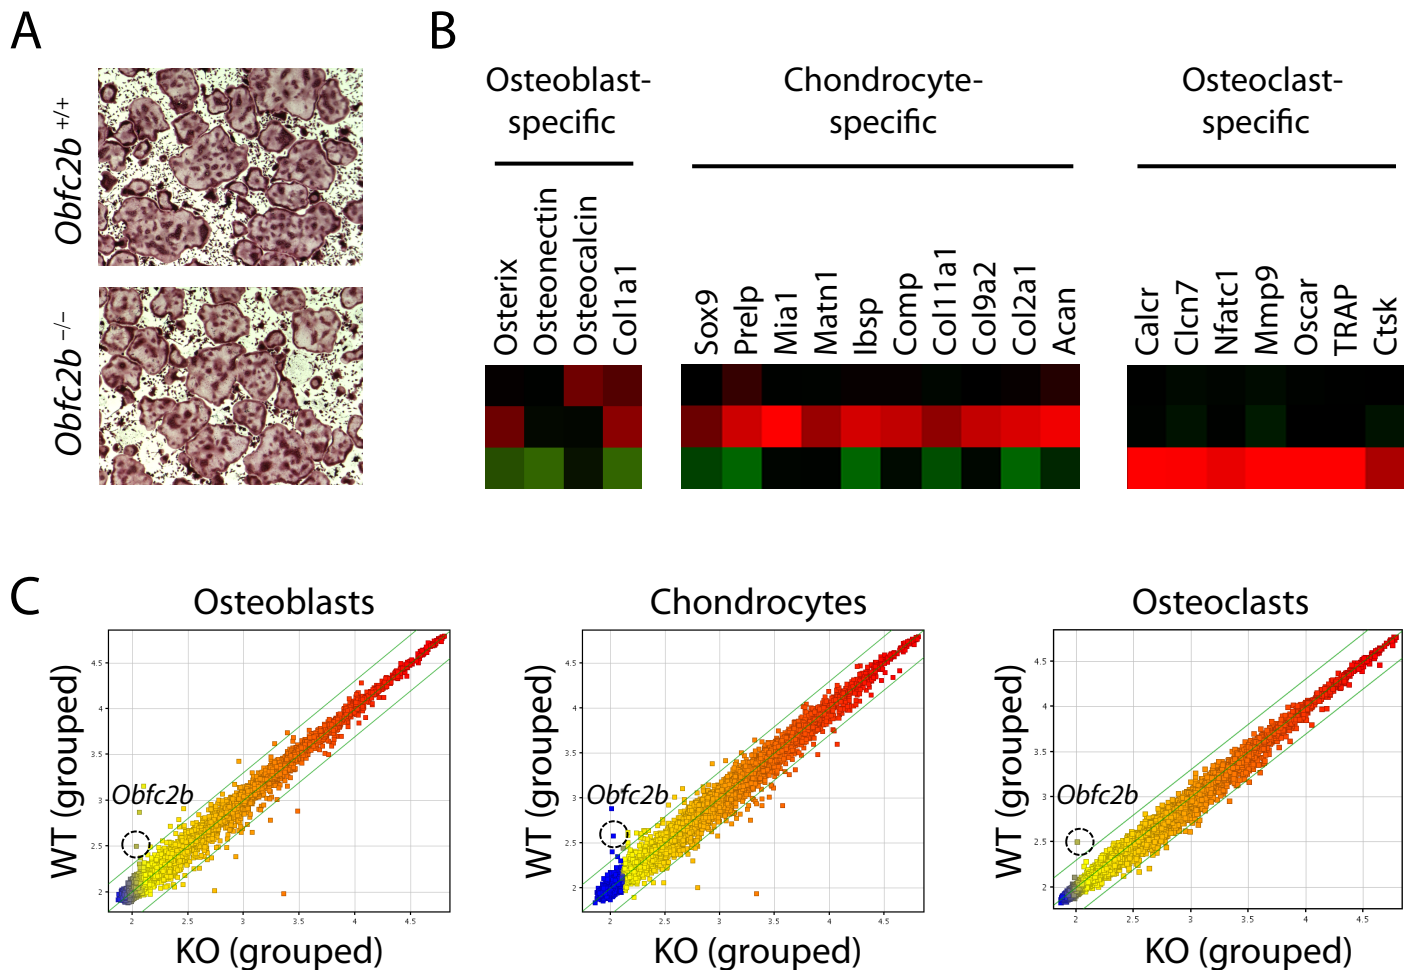

**Supplemental Figure 3: Loss of *Obfc2b* does not result in significant changes in isolated chondrocytes, osteoblasts and osteoclasts.**

(A) Tartrate-resistant Acidic Phosphatase (TRAP) staining of *Obfc2b*<sup>+/+</sup> and *Obfc2b*<sup>-/-</sup> bone marrow cells after 5 days in cell culture with 30ng/ml murine M-CSF and 40ng/ml RANK-L. (B, C) Gene array analysis (Illumina MouseRef-8 v2.0 Expression BeadChip) of chondrocytes isolated from the sternum, osteoblast isolated from the calvaria of the skull, and osteoclast induced by 5 days of stimulation by RANK-L and M-CSF as described in (A). Shown are average values of two independent experiments. (B) The expression values of genes specific for osteoclast, chondrocyte and osteoclast lineages, respectively, are shown by heat map representation for *Obfc2b*<sup>+/+</sup> cells. (C) Dot plot diagrams representing gene array results by comparing the expression values of *Obfc2b*<sup>+/+</sup> and *Obfc2b*<sup>-/-</sup> cells. Note that the only significant differences relate to *Obfc2b* or genes encoded by X- and Y-chromosomes.

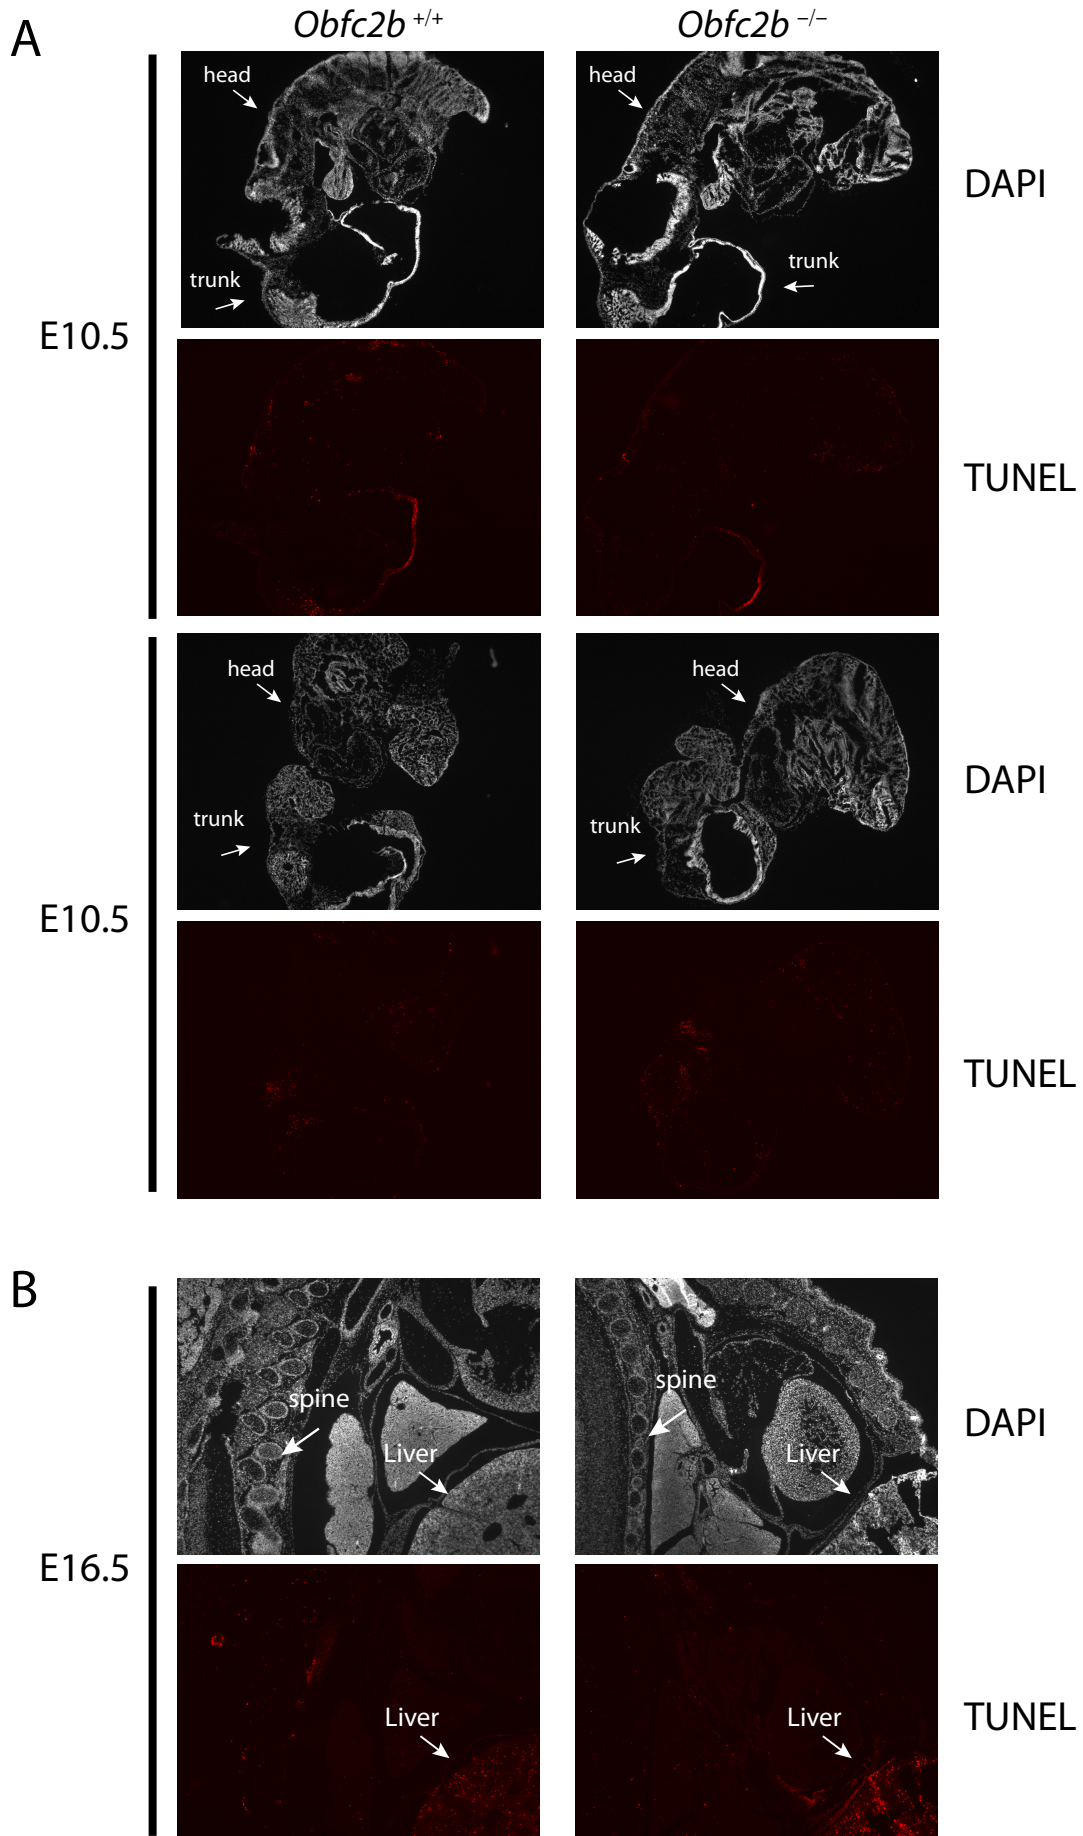



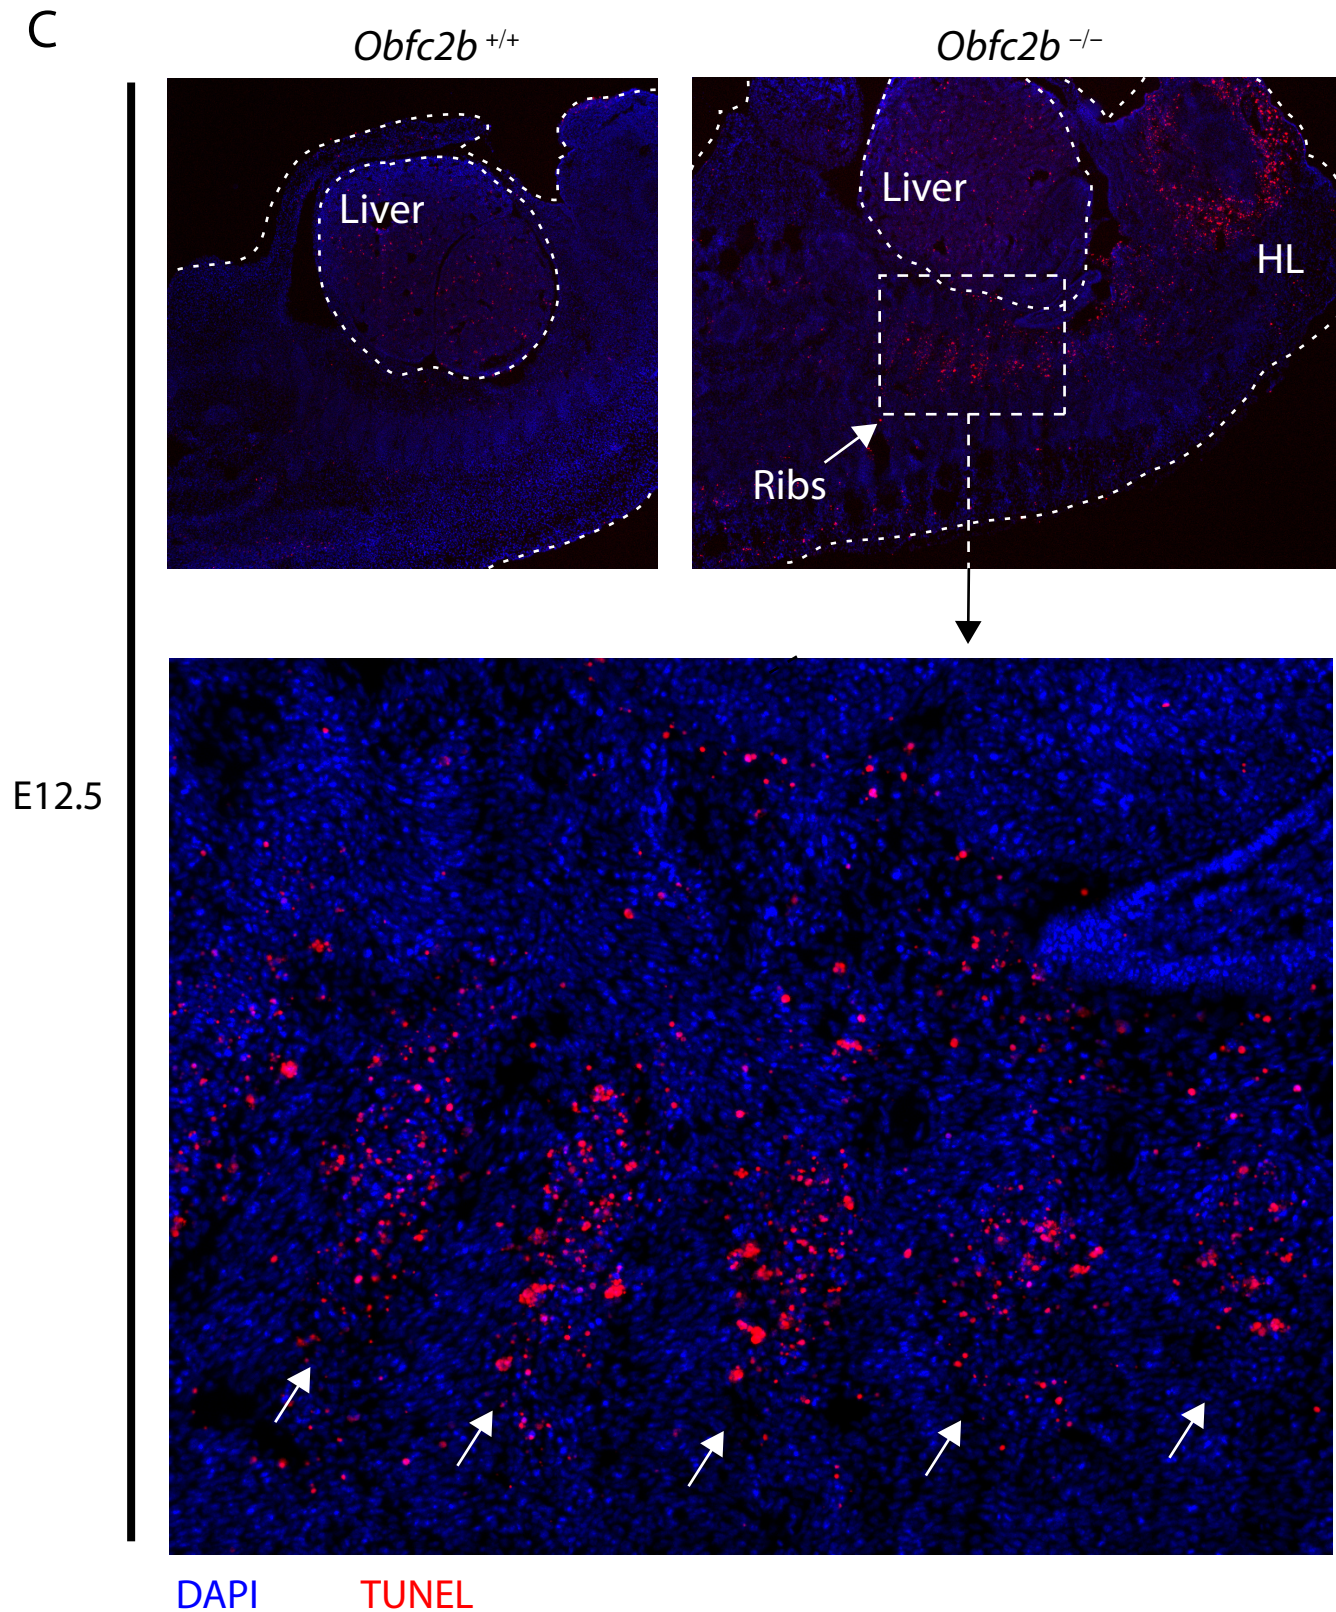

**Supplemental Figure 4: TUNEL analysis of *Obfc2b*<sup>+/+</sup> and *Obfc2b*<sup>-/-</sup> embryos from E10.5 and E16.5.**

(A/B) Sections from E10.5 (A) and E16.5 (B) embryos were stained with DAPI and by TUNEL. Representative slides are shown. For each time point two *Obfc2b*<sup>+/+</sup> and two *Obfc2b*<sup>-/-</sup> embryos were analyzed. (C) Representative slides of DAPI (blue) and TUNEL (red) stained tissue sections from E12.5 embryos as shown in Figure 3 (upper panel). Enlarged image of the area of developing ribs in *Obfc2b*<sup>-/-</sup> embryos showing extensive apoptosis by TUNEL staining is shown separately (lower panel).

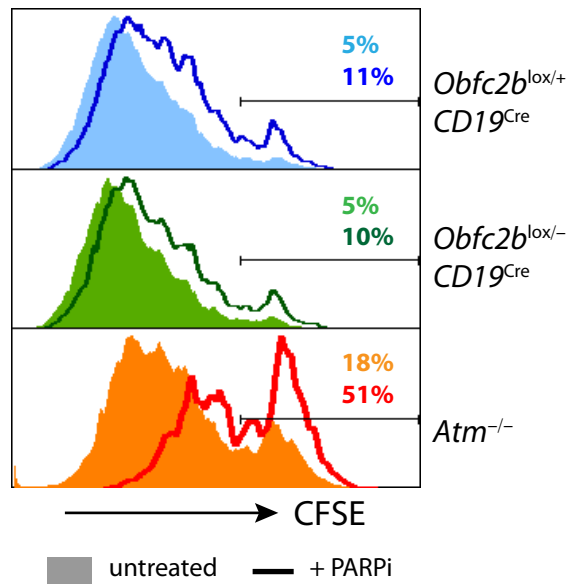

**Supplemental Figure 5: PARPi sensitivity analysis**

Sensitivity to inhibitor of Poly-ADP-Ribose-Polymerase (PARPi): B cells were labeled with carboxyfluorescein succinimidyl ester (CFSE) to visualize proliferation and kept for 4 days in culture with LPS and IL4, and with or without 1  $\mu$ M Ku58948 (PARPi). For quantification of cells with delayed proliferation (CFSE-positive), a gate for untreated control cells (*Obfc2b<sup>+/+</sup>;CD19<sup>Cre/+</sup>* or *Obfc2b<sup>lox/+</sup>;CD19<sup>Cre/+</sup>*) was set to contain 5% of CFSE-positive cells for each individual experiment. The percentage was then compared to the percentage of cells within this gate for all other conditions.

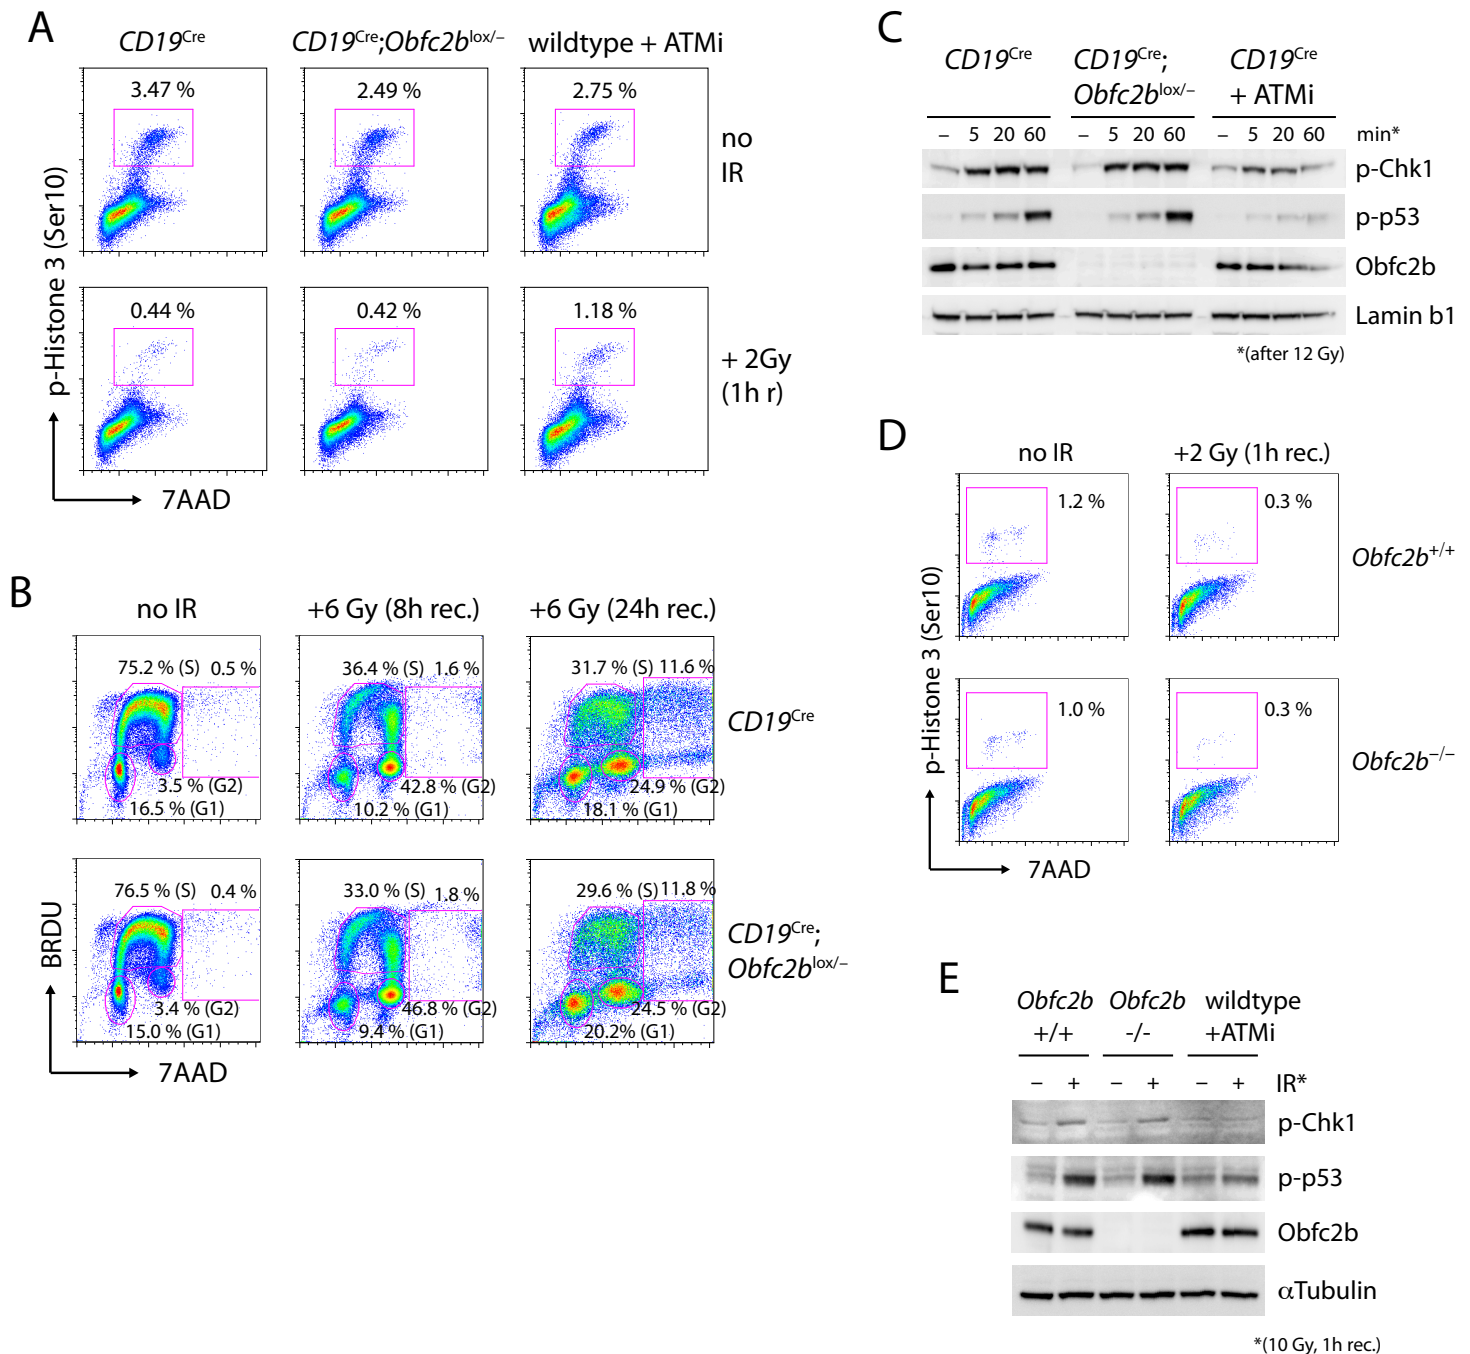

### Supplemental Figure 6: PARPi sensitivity and cell cycle analysis

(A) Normal G2/M checkpoint in *Obfc2b<sup>-/-</sup>* B cells. Proliferating B cells from wildtype (*CD19<sup>Cre/+</sup>;Obfc2b<sup>+/+</sup>*) and conditional knockout (*CD19<sup>Cre/+</sup>;Obfc2b<sup>lox/-</sup>*) mice were analyzed for Histone 3 (Ser10) phosphorylation before and after irradiation (2Gy, 1 hour recovery). 7AAD was used to stain DNA content. As a control, wildtype (*CD19<sup>Cre/+</sup>;Obfc2b<sup>+/+</sup>*) B cells were treated with 2.5 $\mu$ M Ku55933 (ATMi). Numbers indicate the percentage of cells with Histone 3 phosphorylation. (B) Normal G1/S checkpoint in *Obfc2b<sup>-/-</sup>* B cells. Proliferating B cells from wildtype (*CD19<sup>Cre/+</sup>;Obfc2b<sup>+/+</sup>*) and conditional knockout (*CD19<sup>Cre/+</sup>;Obfc2b<sup>lox/-</sup>*) mice were pulsed with BrdU and subjected to cell cycle analysis. Cells were either mock treated (left) or irradiated with 6 Gy, and allowed to recover for 8 (middle) or 24 hours (right). 7AAD was used to stain DNA content. Numbers indicate the percentage of cells in G1-, S- and G2 phase of the cell cycle; or the percentage of cells with >4N. (C) Western blot analysis of irradiation induced phosphorylation of Chk1 (Ser317) and p53 (Ser15) at different time points post IR (12 Gy) as indicated. Proliferating B cells from wildtype (*CD19<sup>Cre/+</sup>;Obfc2b<sup>+/+</sup>*) and conditional knockout (*CD19<sup>Cre/+</sup>;Obfc2b<sup>lox/-</sup>*) mice were used. Wildtype (*CD19<sup>Cre/+</sup>;Obfc2b<sup>+/+</sup>*) B cells treated with 2.5 $\mu$ M Ku55933 (ATMi) were used as a control. (D) Normal G2/M checkpoint in *Obfc2b<sup>-/-</sup>* MEFs. Primary *Obfc2b<sup>+/+</sup>* and *Obfc2b<sup>-/-</sup>* MEFs were analyzed for Histone 3 (Ser10) phosphorylation before and after irradiation (2Gy, 1 hour recovery). 7AAD was used to stain DNA content. (E) Normal IR-induced phosphorylations in *Obfc2b<sup>-/-</sup>* MEFs. Western blot for phosphorylated Chk1 (Ser317), p53 (Ser15), and for Obfc2b and  $\alpha$ Tubulin on lysates from primary *Obfc2b<sup>+/+</sup>* and *Obfc2b<sup>-/-</sup>* MEFs irradiated as indicated. As a control, wildtype MEFs have been treated with 2.5  $\mu$ M Ku55933 (ATMi) one hour before irradiation.

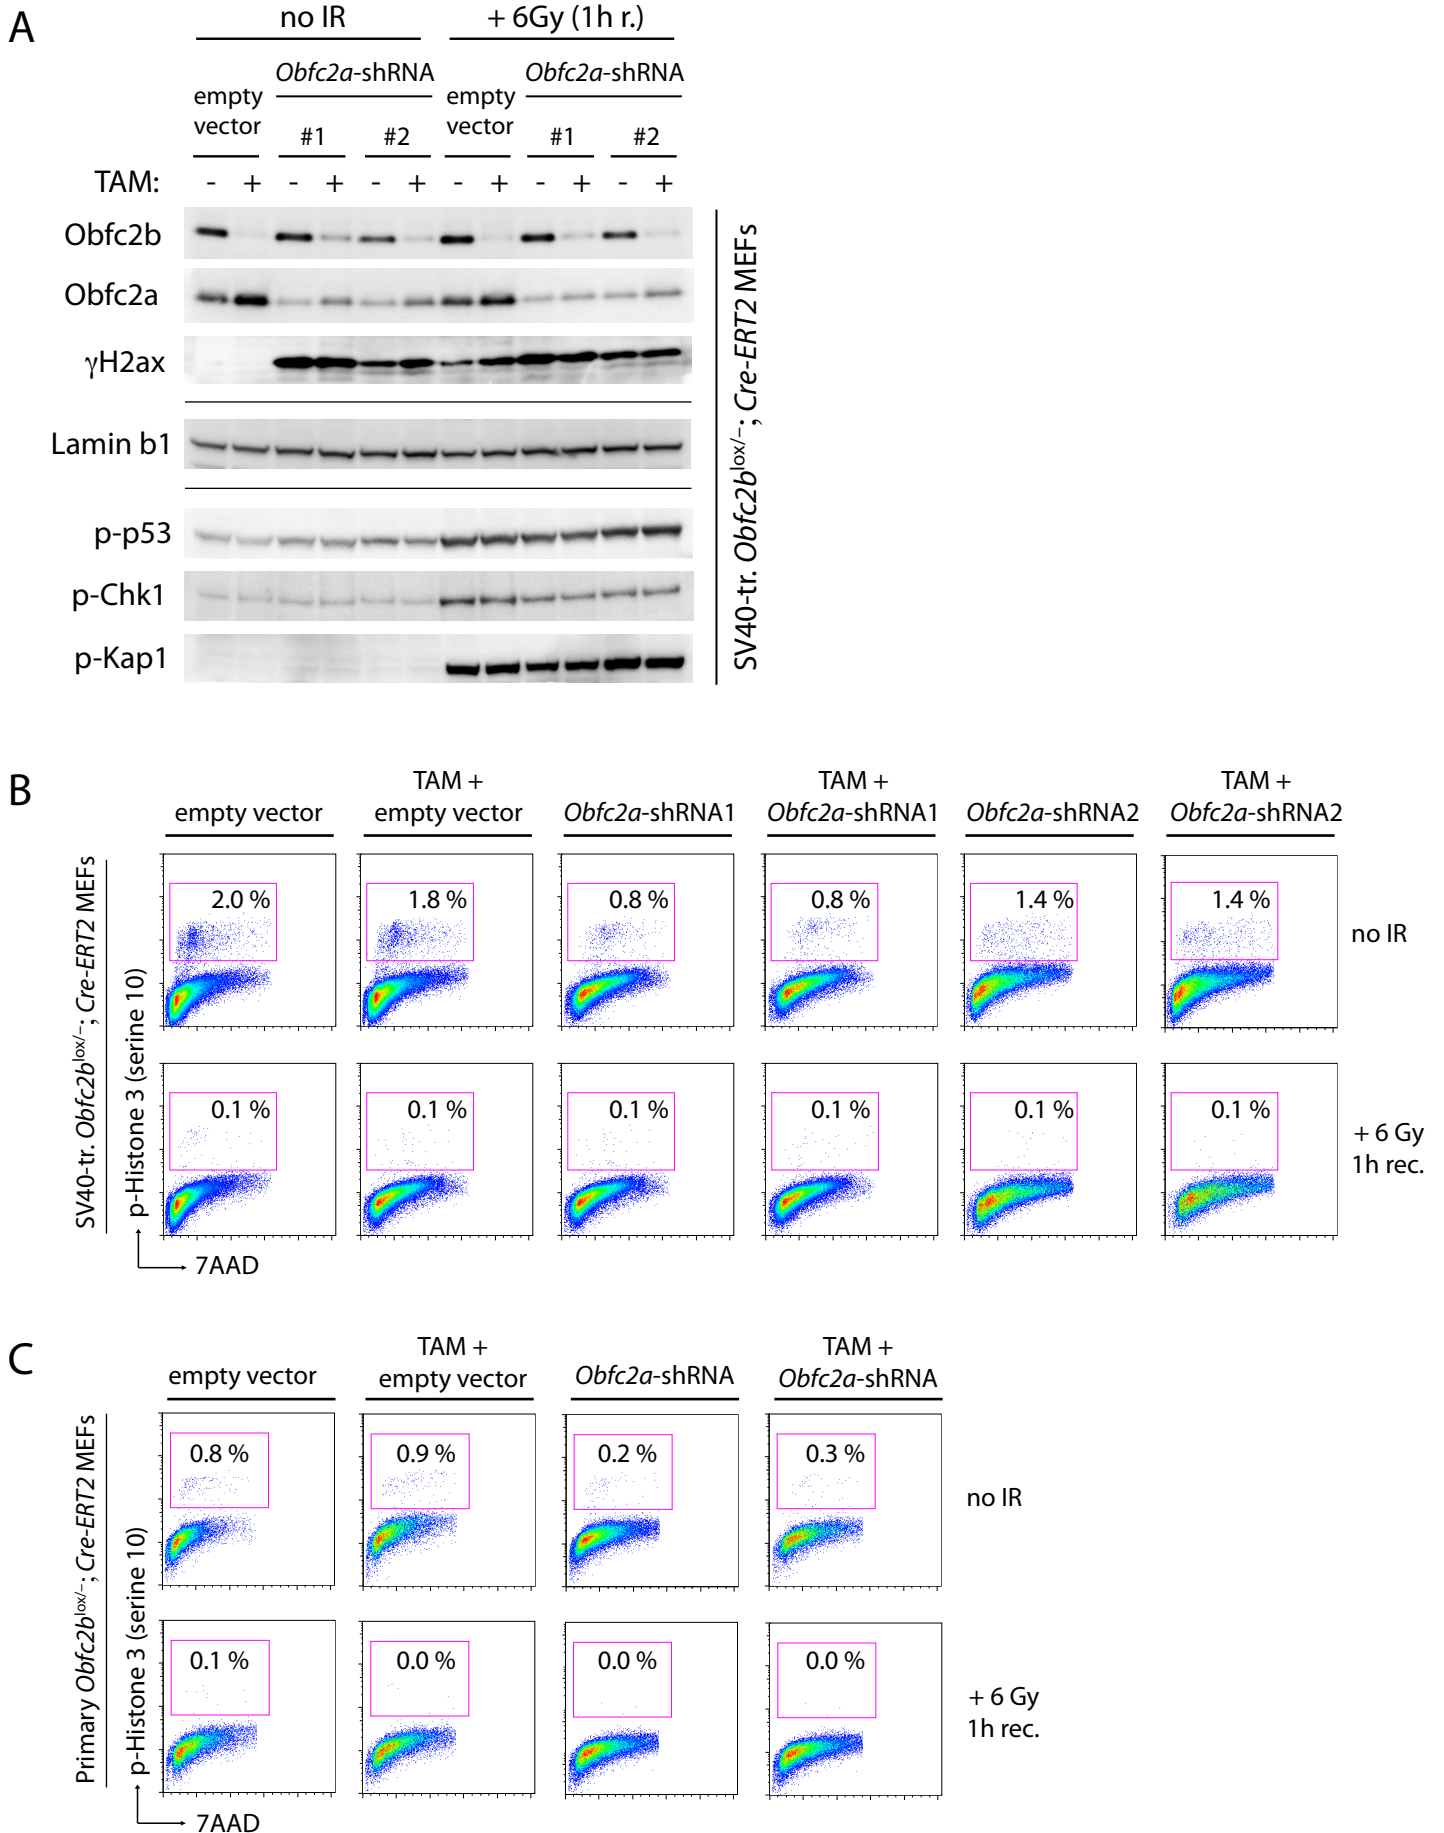

D

Day 3 post infection:

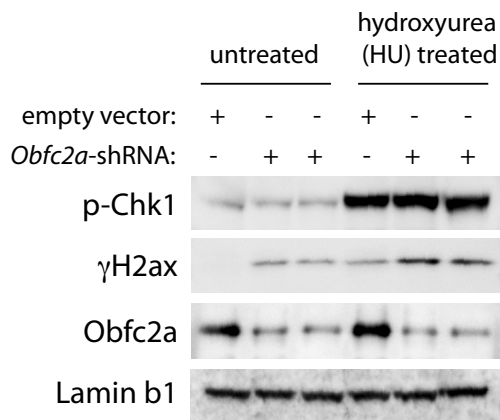**Supplemental Figure 7: Comparison of *Obfc2b* deficiency to *Obfc2a* and *Obfc2b/Obfc2a* double deficiency.**

(A,B,C) Analysis of SV40 transformed *Obfc2b<sup>lox/-</sup>Cre-ERT2* MEFs infected with empty vector or *Obfc2a*-shRNA encoding vectors and treated with or without Tamoxifen (TAM) as described in Fig.7A. For TAM induced *Obfc2b* deletion, 2-3 days after infection MEFs were treated with 5 $\mu$ M TAM for 48 h. 3 days after TAM treatment MEFs were irradiated as indicated and harvested for analysis. Protein lysates from MEFs were analyzed by Western blot for *Obfc2b*, *Obfc2a*, phosphorylated H2ax (serine 139,  $\gamma$ H2ax), Lamin b1, phosphorylated p53 (serine 15), phosphorylated Chk1 (serine 317) and phosphorylated Kap1 (serine 824). (B,C) Analysis of histone 3 phosphorylation (serine 10) by flow cytometry. Representative FACS plots are shown. Numbers indicate the percentage of cells exhibiting histone 3 phosphorylation. SV40-transformed (B) and primary (C) *Obfc2b<sup>lox/-</sup>Cre-ERT2* MEFs as described in Figure 7A have been analyzed. (D) SV40 transformed *Obfc2b<sup>lox/-</sup>Cre-ERT2* MEFs infected with empty vector or *Obfc2a*-shRNA encoding vectors were treated on day 3 post infection with 3mM hydroxyurea (HU) for 2 hours. MEFs were then analyzed by Western blot for *Obfc2a*, phosphorylated H2ax (serine 139,  $\gamma$ H2ax), phosphorylated Chk1 (serine 317) and Lamin b1.
